# Supplementary material
Source: publisher figshare collection journal article supplement (https://springernature.figshare.com/ndownloader/files/22748735)
Supplement: Supplementary file [file 22748735]

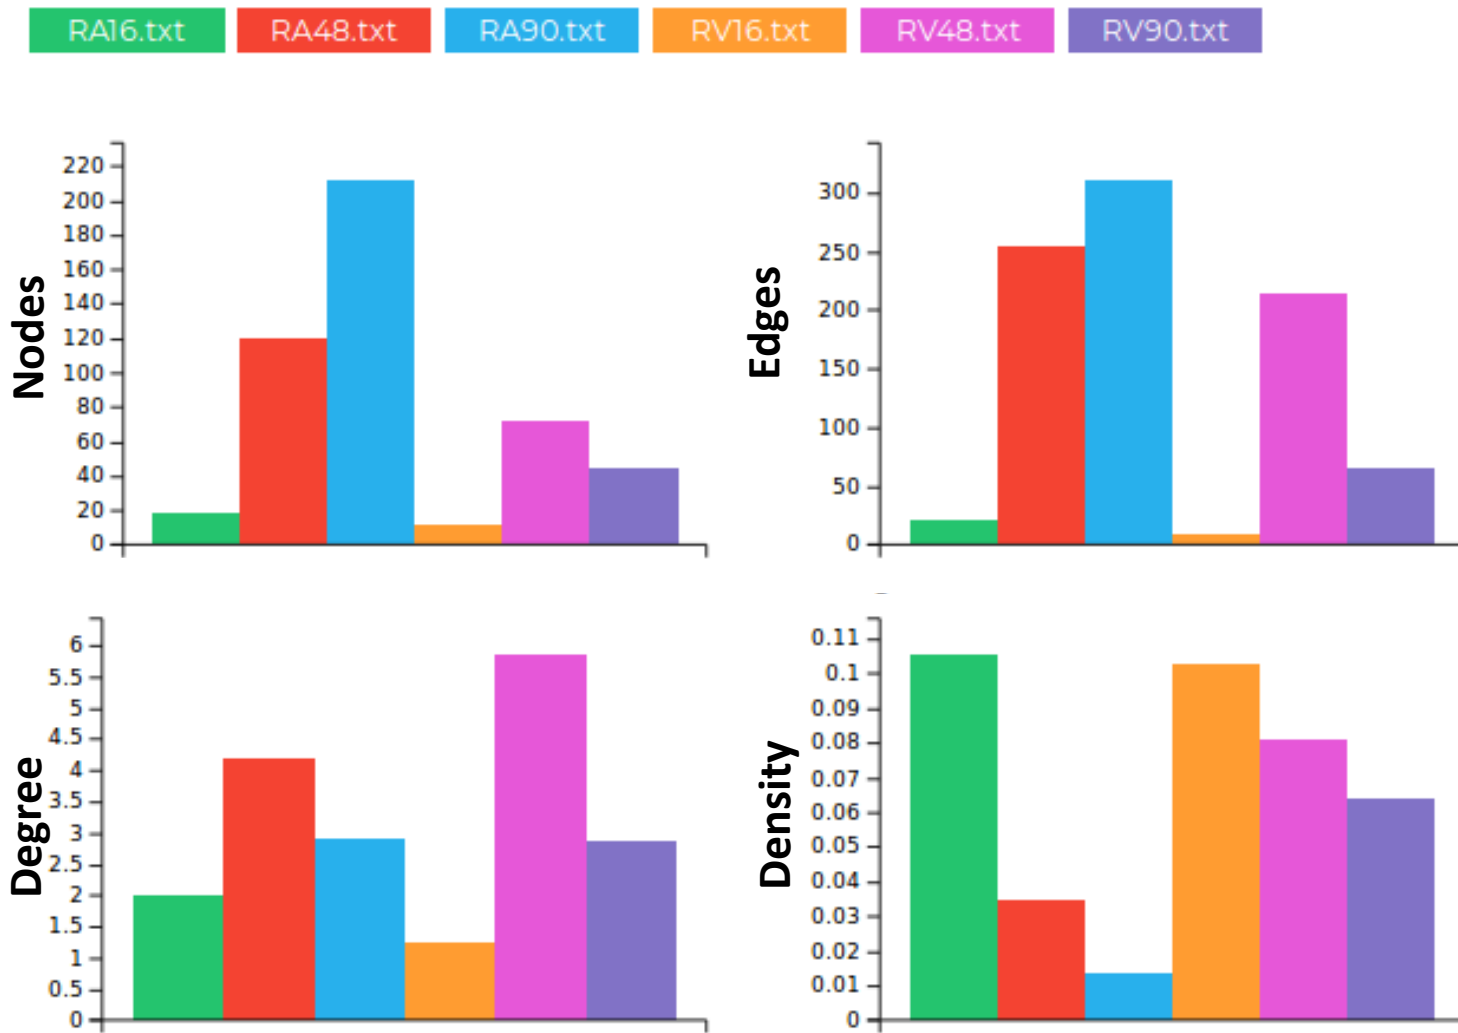

**Figure S31:** Global graph properties of four time series human gene perturbation (16hr, 48hr and 90hr) networks corresponding to avirulent (RA) and virulent (RV) strains

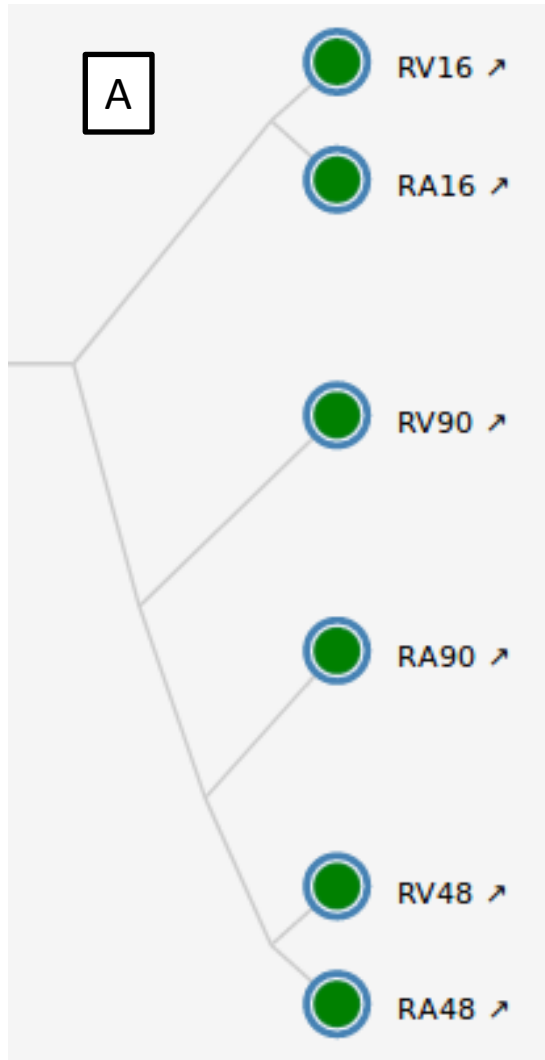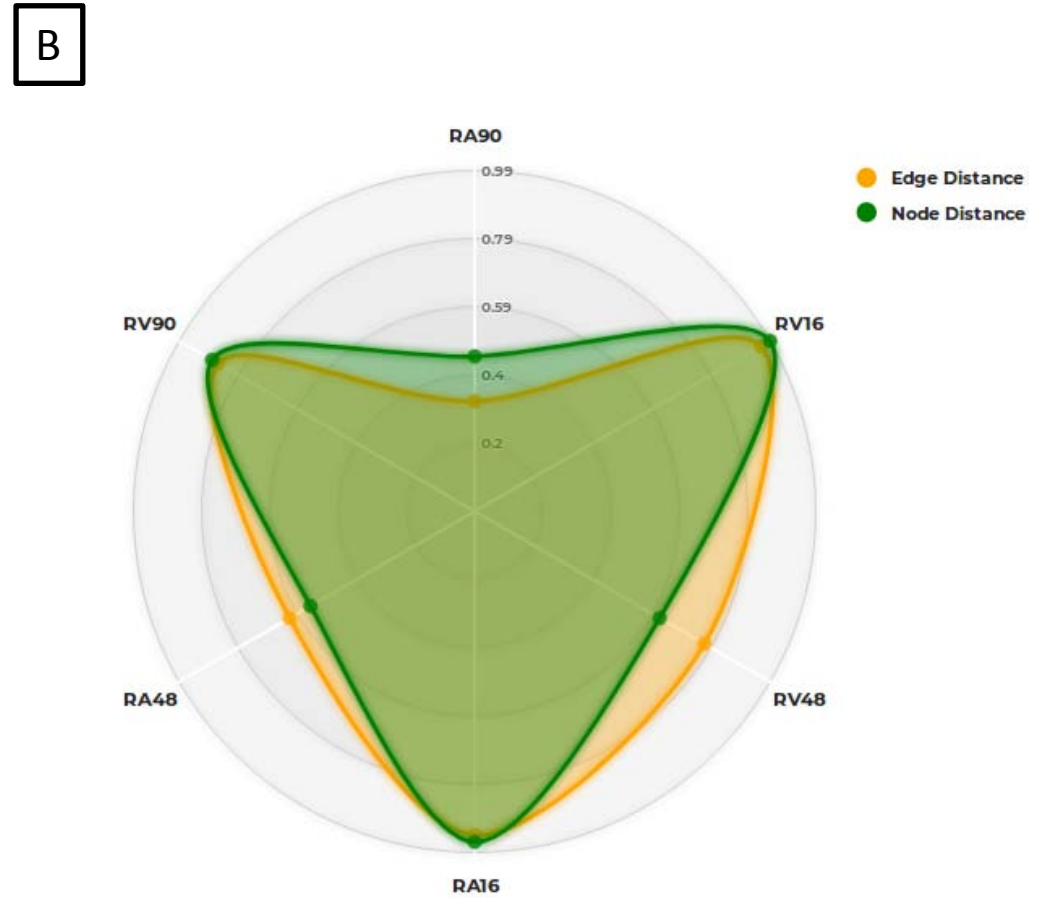

**Figure S32:** Comparison of the networks using (A) cluster network tree with Jaccard Edge distance and (B) radar plot of node and edge Jaccard distance from the union network

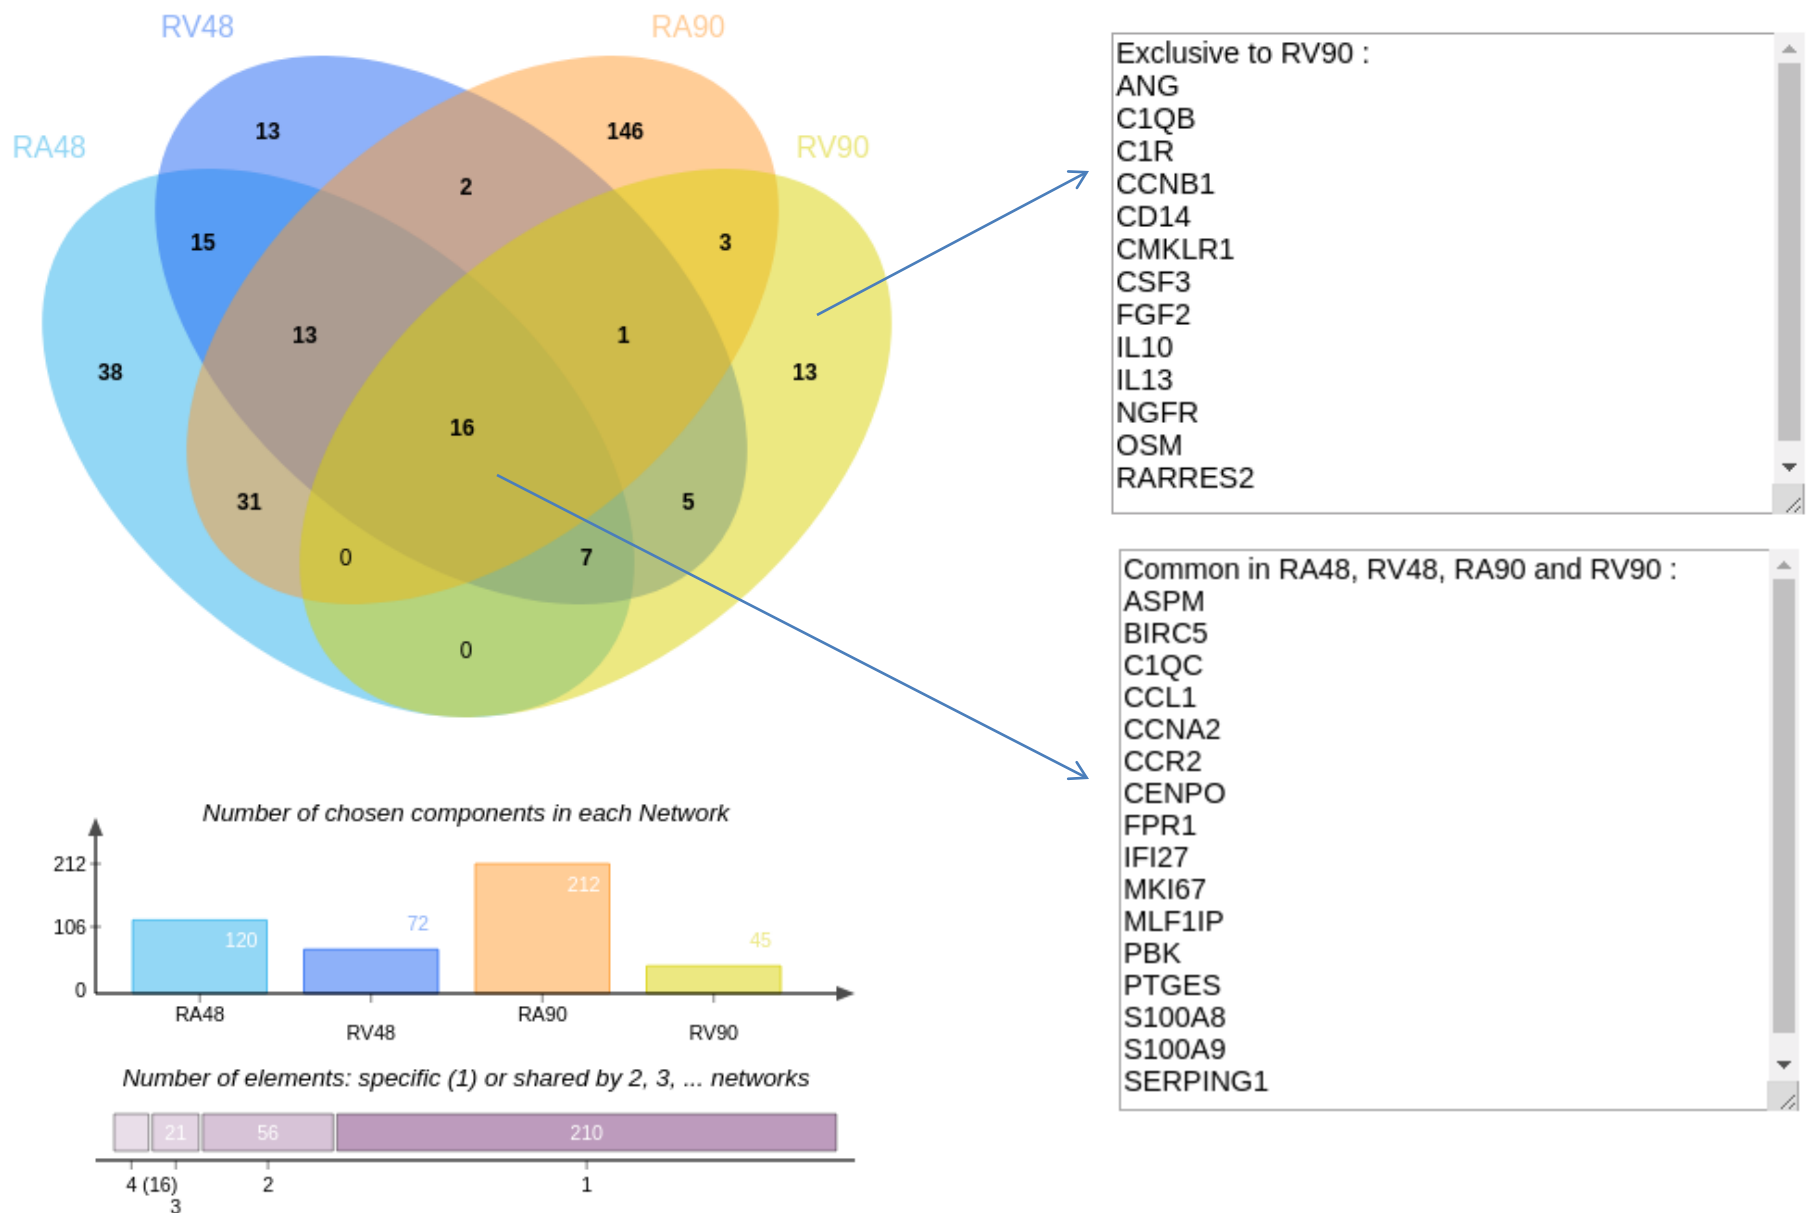

**Figure S33:** Visualizing similarities and differences between the post infection time point networks in H37Ra and H37Rv

A

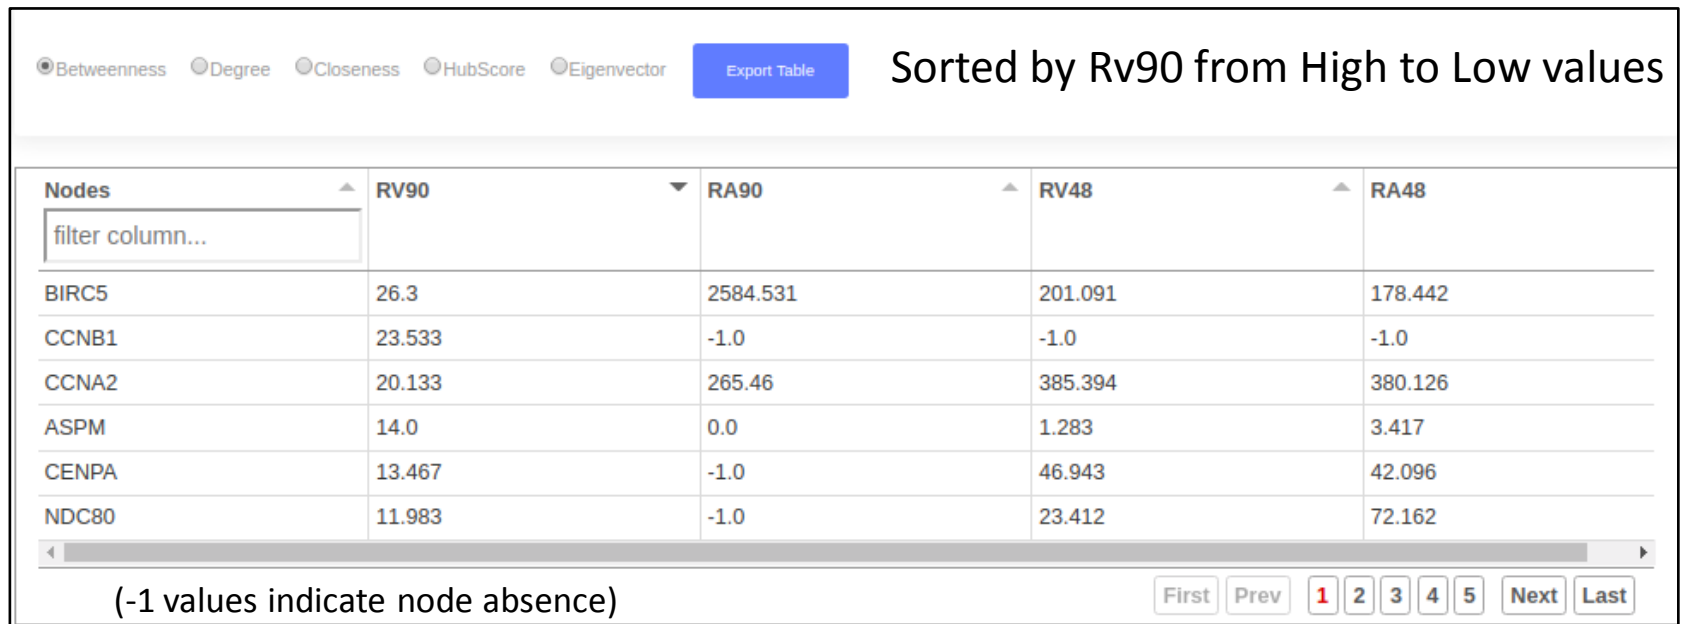

B

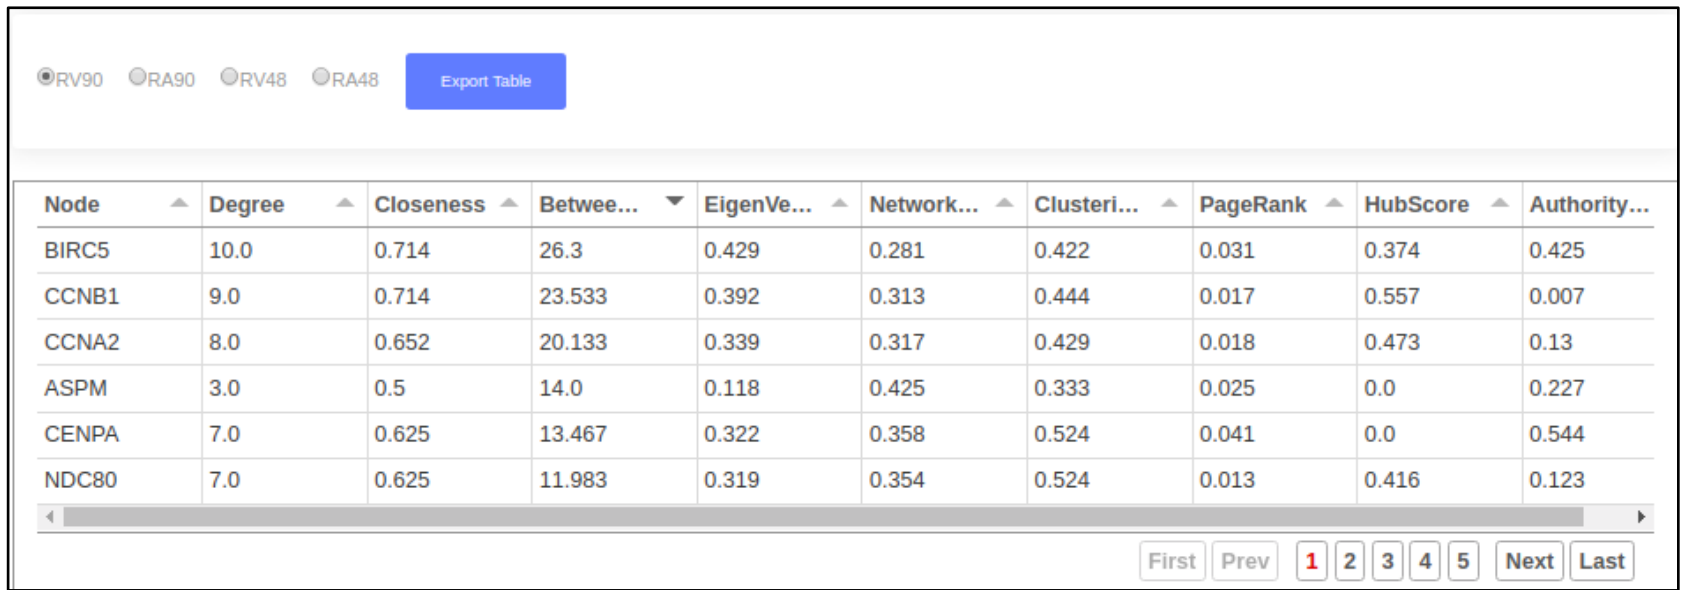

**Figure S34:** (A) Visualizing nodes sorted with betweenness across various networks (B) visualizing variation of other network properties of the same nodes

| Size | Network                                                                                       | CliqueID | Clique Membership                                                                      |
|------|-----------------------------------------------------------------------------------------------|----------|----------------------------------------------------------------------------------------|
| 13   | <b>RV48</b>  | Clique-4 | <b>BIRC5</b> BUB1B NDC80 CDCA8 CENPM CENPE SPC25 CENPA CENPF ZWINT CENPN MLF1IP AURKB  |
| 13   | <b>RV48</b>  | Clique-5 | <b>BIRC5</b> BUB1B NDC80 CDCA8 CENPM CENPE SPC25 CENPA CENPF ZWINT CENPN MLF1IP KIF18A |
| 13   | <b>RV48</b>  | Clique-6 | <b>BIRC5</b> BUB1B NDC80 CDCA8 CENPM CENPE SPC25 CENPA CENPF ZWINT CENPN NUF2 AURKB    |
| 6    | <b>RV48</b>  | Clique-0 | <b>BIRC5</b> BUB1B CCNA2 CENPA CENPE CDCA8                                             |
| 6    | <b>RV48</b>  | Clique-2 | <b>BIRC5</b> BUB1B CCNA2 PBK NCAPG RRM2                                                |
| 5    | <b>RV90</b>  | Clique-1 | <b>BIRC5</b> CCNB1 CCNA2 MKI67 PBK                                                     |
| 5    | <b>RV90</b>  | Clique-2 | <b>BIRC5</b> CCNB1 CCNA2 MKI67 CDKN3                                                   |
| 5    | <b>RV90</b>  | Clique-5 | <b>BIRC5</b> MLF1IP NDC80 KIF18A CENPA                                                 |
| 5    | <b>RV48</b>  | Clique-1 | <b>BIRC5</b> BUB1B CCNA2 PBK CDCA8                                                     |
| 5    | <b>RV48</b>  | Clique-7 | <b>BIRC5</b> BUB1B NDC80 CDCA8 PBK                                                     |

**Figure S35:** Clique containing BIRC5 in the virulent strain infection networks

Source

Target

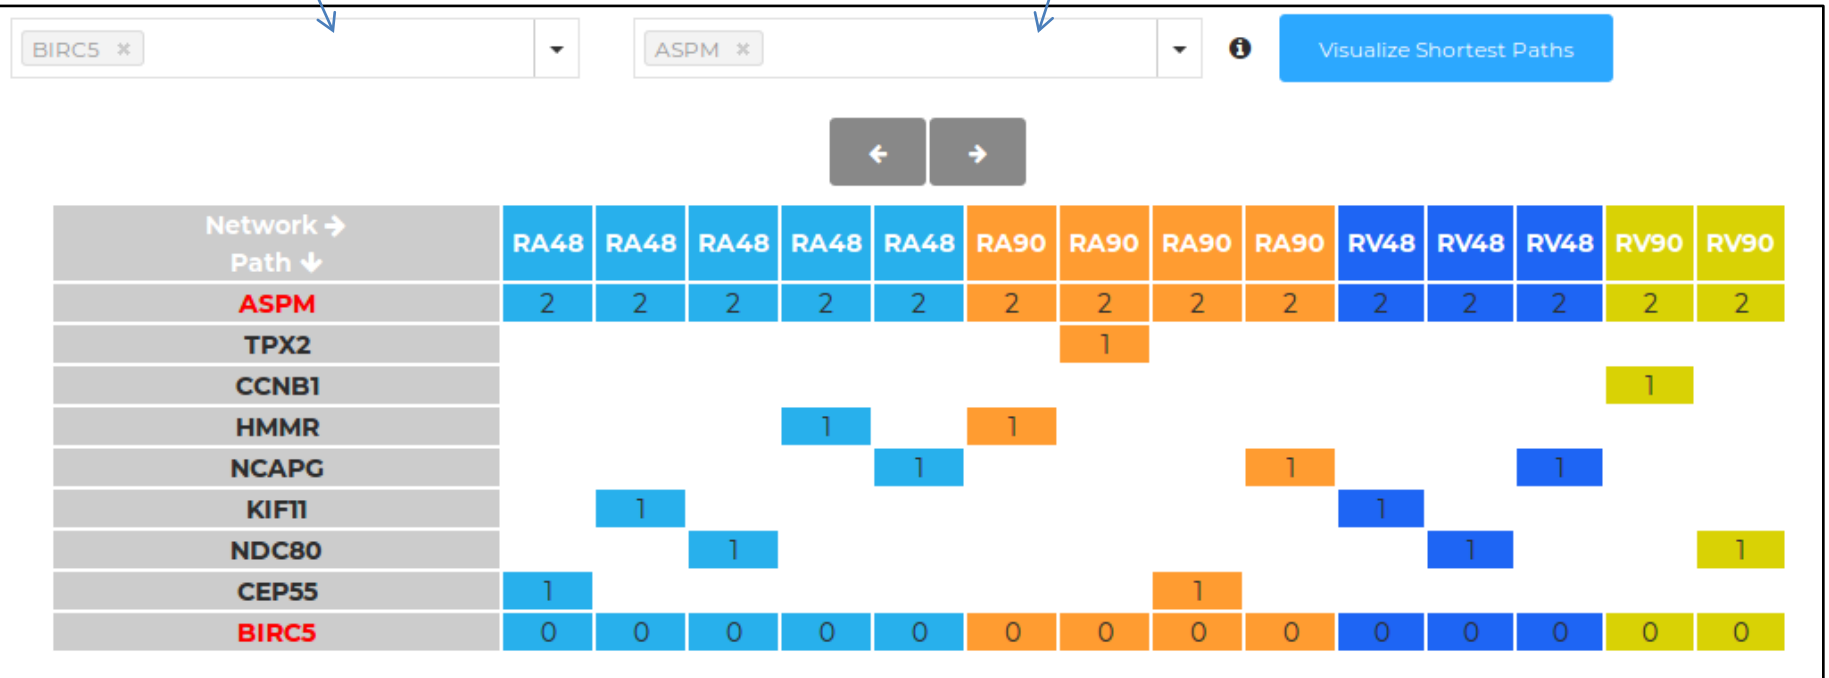

**Figure S36:** Visualizing differential shortest paths for connected perturbation

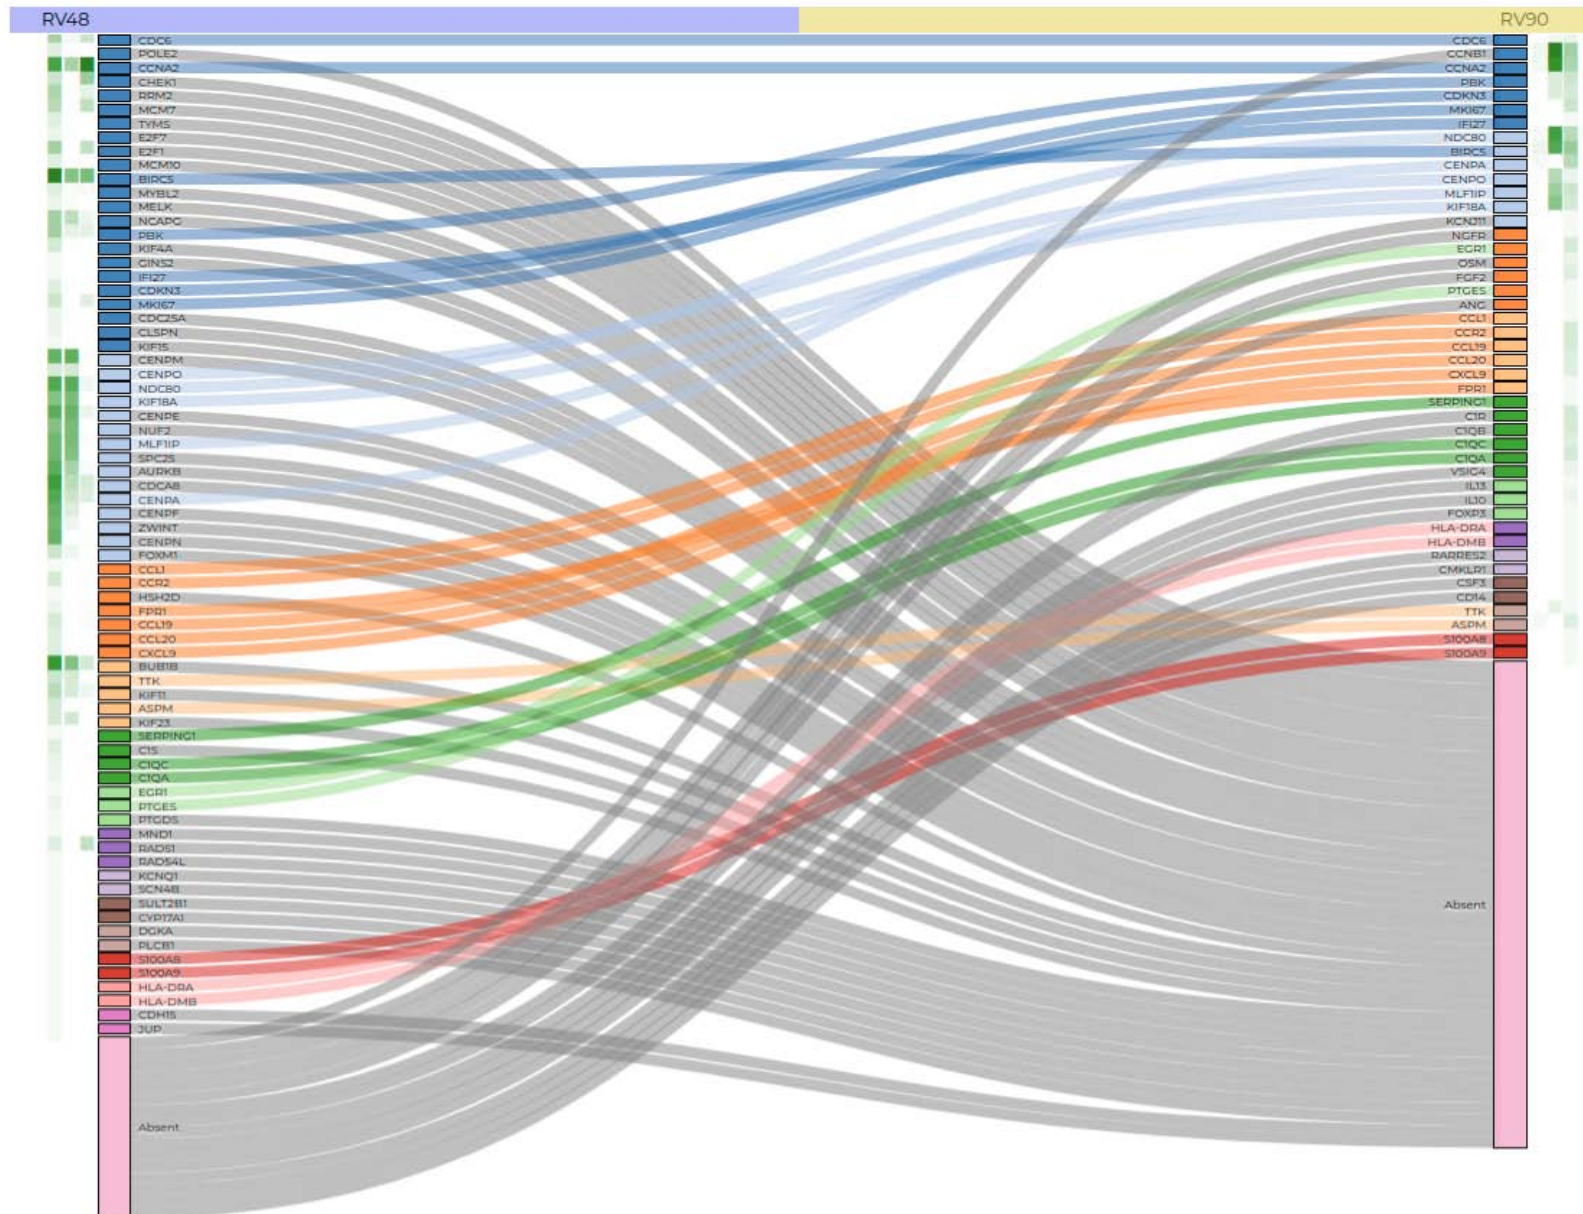

**Figure S37:** Visualizing changes in community structure between the 48<sup>th</sup> and 90<sup>th</sup> hour network of H37Rv infected human cells
